# Supplementary material for: SUMOylation of the ubiquitin ligase IDOL decreases LDL receptor levels and is reversed by SENP1
Source: PubMed Central journal article supplement (PMC7948399; doi:10.1074/jbc.ra120.015420), 2020-11-23
Supplement: mmc1.pdf [file mmc1.pdf]

# **SUMOylation of the ubiquitin ligase IDOL decreases LDL receptor levels and is reversed by SENP1**

Ju-Qiong Wang<sup>1</sup>, Zi-Cun Lin<sup>1</sup>, Liang-Liang Li<sup>1</sup>, Shao-Fang Zhang<sup>1</sup>, Wei-Hui Li<sup>1</sup>, Wei Liu<sup>1</sup>,  
Bao-Liang Song<sup>1</sup>, Jie Luo<sup>1,†</sup>

## **List of Supporting Information**

Figure S1. PCSK9-induced LDLR degradation is not altered by SENP1 overexpression.

Figure S2. LXR agonist effectively induces mRNA expression but neither SUMOylation nor protein expression of IDOL.

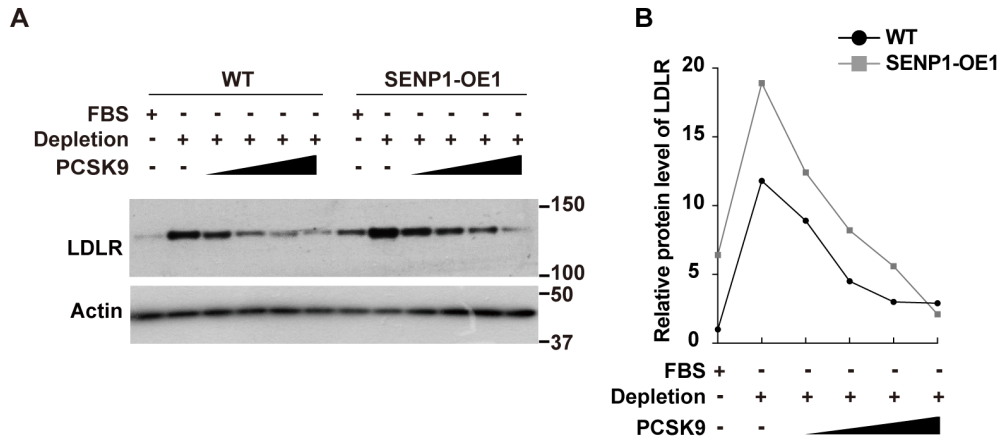

**Figure S1. PCSK9-induced LDLR degradation is not altered by SENP1 overexpression.** CRL1601 and SENP1-OE1 cells were incubated with fetal bovine serum (FBS)-containing medium or cholesterol depletion medium (medium A plus 5% lipoprotein-deficient serum, 1  $\mu$ M lovastatin and 10  $\mu$ M mevalonate) in the absence or presence of increasing concentrations of PCSK9 for 4 h. After 48 h, cells were harvested for immunoblotting analysis (*A*). Densitometric analysis of the endogenous LDLR protein is shown in (*B*). The densitometry of LDLR protein in CRL1601 cells grown in FBS condition is defined as 1. Results are from a single experiment.

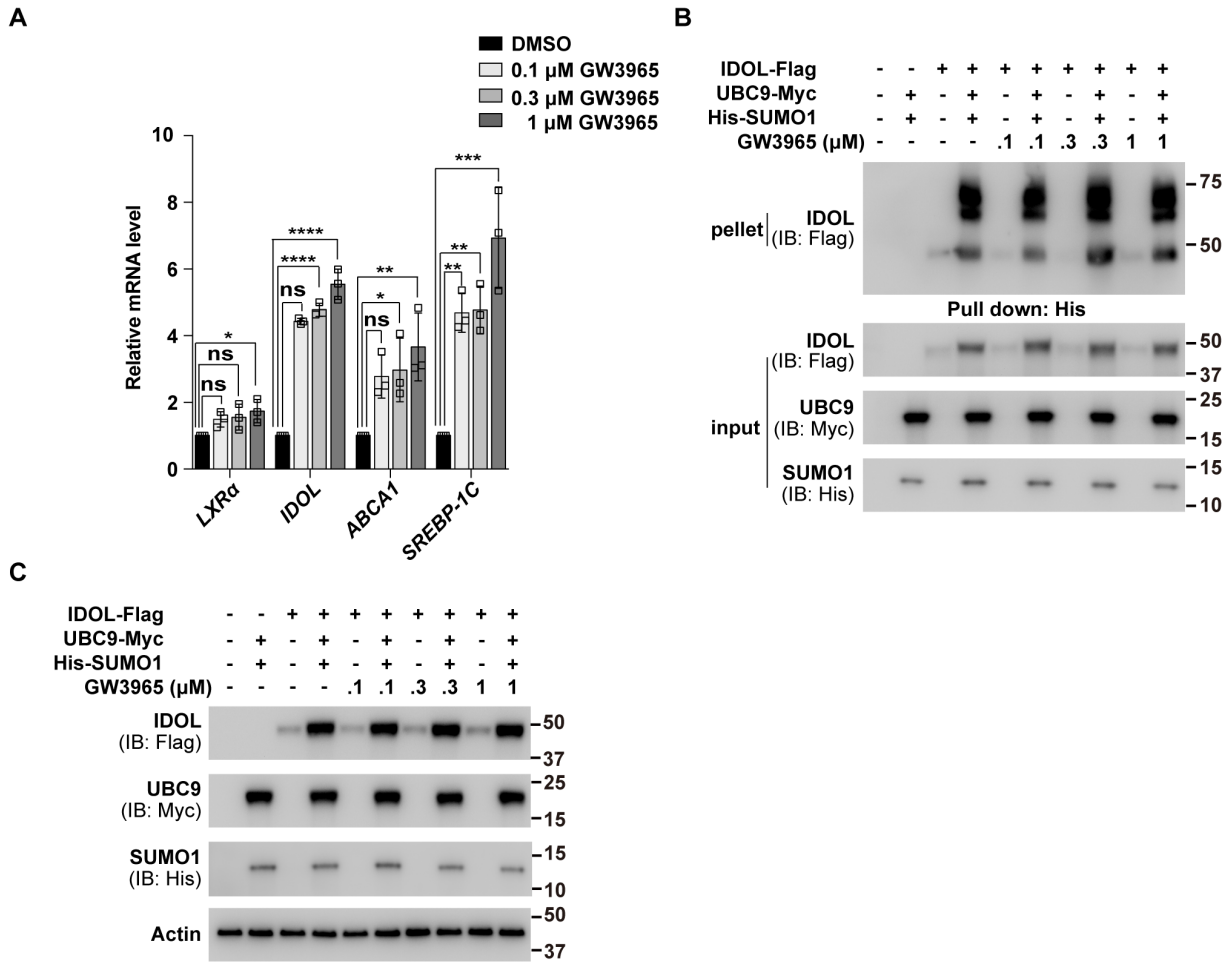

**Figure S2. LXR agonist effectively induces mRNA expression but neither SUMOylation nor protein expression of IDOL.** *A*, Huh7 cells were incubated in the medium containing 5% delipidated-fetal calf serum, 1  $\mu\text{M}$  lovastatin and 10  $\mu\text{M}$  mevalonate and the indicated concentrations of GW3965 for 16 h. Cells were then harvested for RT-qPCR analysis. Data are normalized to DMSO-treated cells and presented as mean  $\pm$  SEM ( $n = 3$  independent experiments). \*  $p < 0.05$ , \*\*  $p < 0.01$ , \*\*\*  $p < 0.001$ , \*\*\*\*  $p < 0.0001$ , ns, no significance. One-way ANOVA. *B-C*, Huh7 cells were transfected as indicated and treated as described in (*A*) for 16 h. Cells were then harvested for the SUMOylation assay (*B*) and immunoblotting (*C*). Results in (*B*) and (*C*) are representative of two independent experiments.
